# Supplementary material
Source: publisher figshare collection journal article supplement (https://tandf.figshare.com/ndownloader/files/22809647)
Supplement: Supplementary file 1 [file 22809647]

**Supplementary Information**

Prop-2-ynyloxybenzyloxy substituted phthalocyanine based polymeric nanoparticles: Synthesis, photophysical properties and *in vitro* PDT efficacy

SHUANGHUANG XIAO, XIUQIN CHEN, QIUHAO YE, KUIZHI CHEN, WENLING XIAO, XINQIAO GUAN, BINGCHENG HUANG, GUOWEI LIU, HUI WEI* and YIRU PENG*


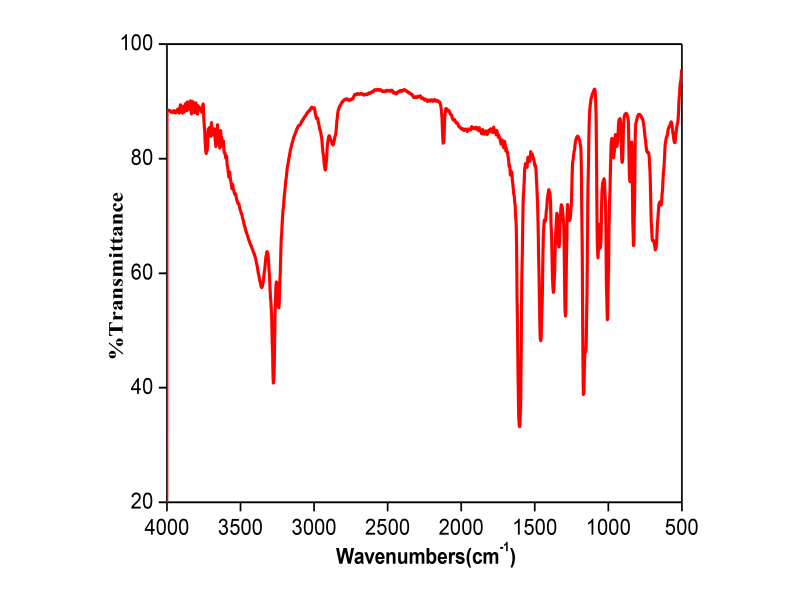


Figure S1. The IR spectrum of **Y1**.


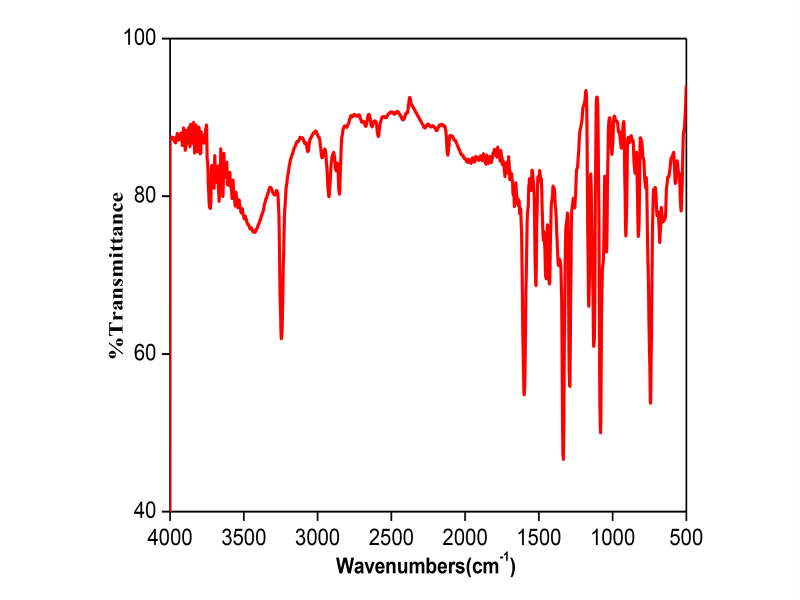


Figure S2. The IR spectrum of YSiPc.


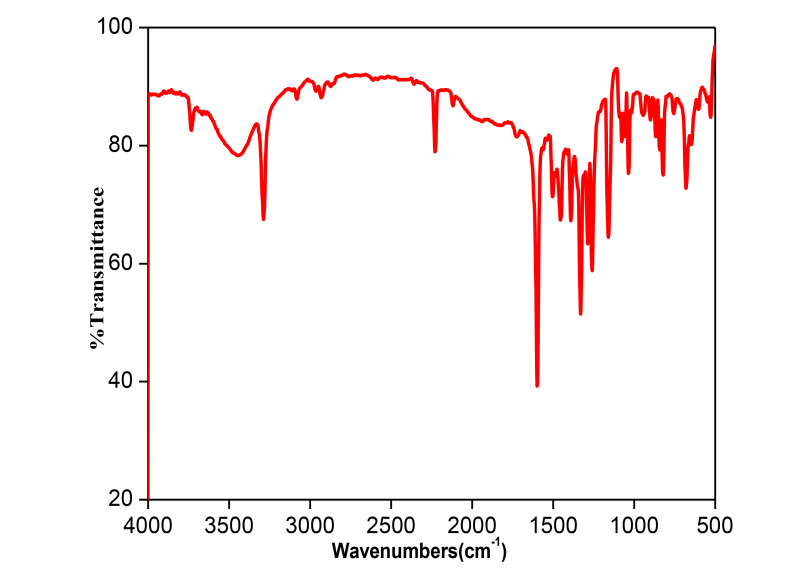


Figure S3. The IR spectrum of **Y2**.


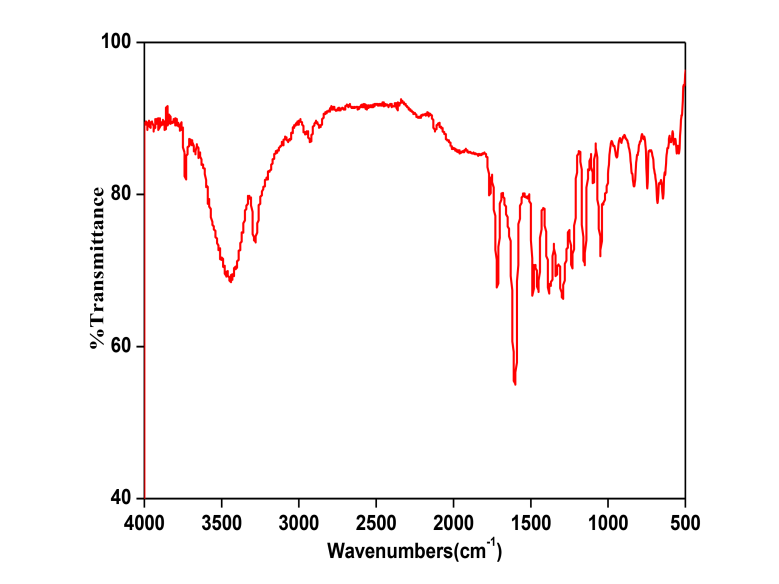


Figure S4. The IR spectrum of YZnPc.


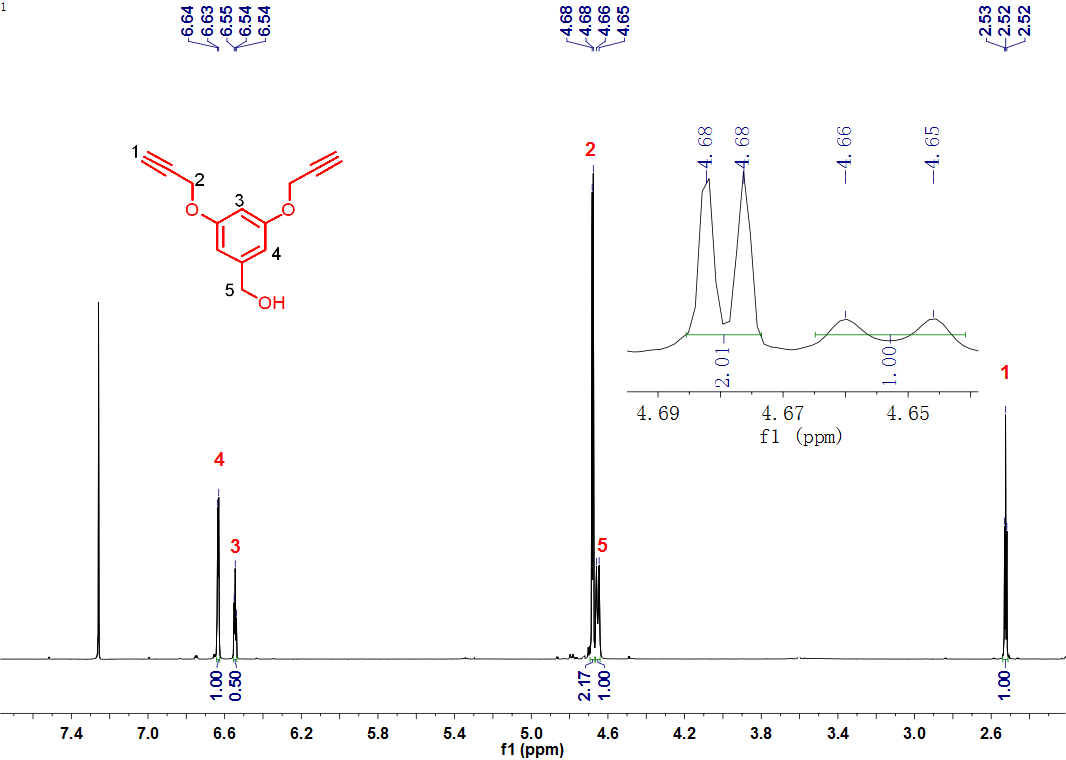


Figure S5. The 1H NMR spectrum of **Y1** (400M Hz, CDCl3).


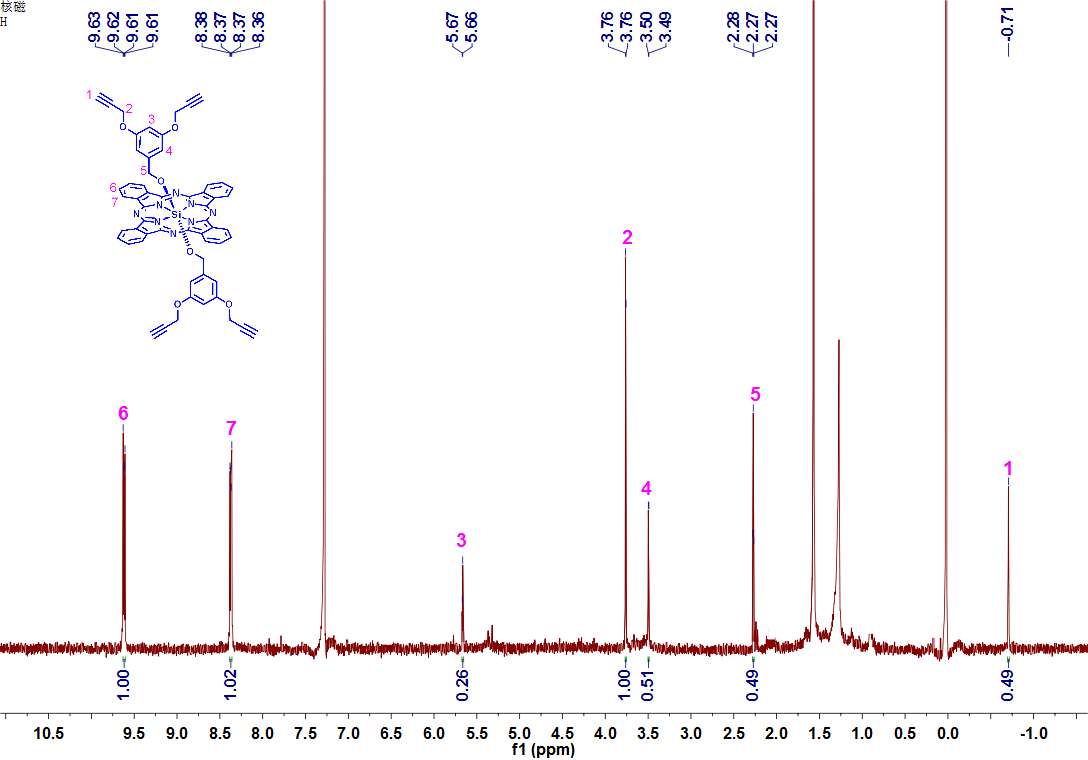


Figure S6. The 1H NMR spectrum of YSiPc (400M Hz, CDCl3).


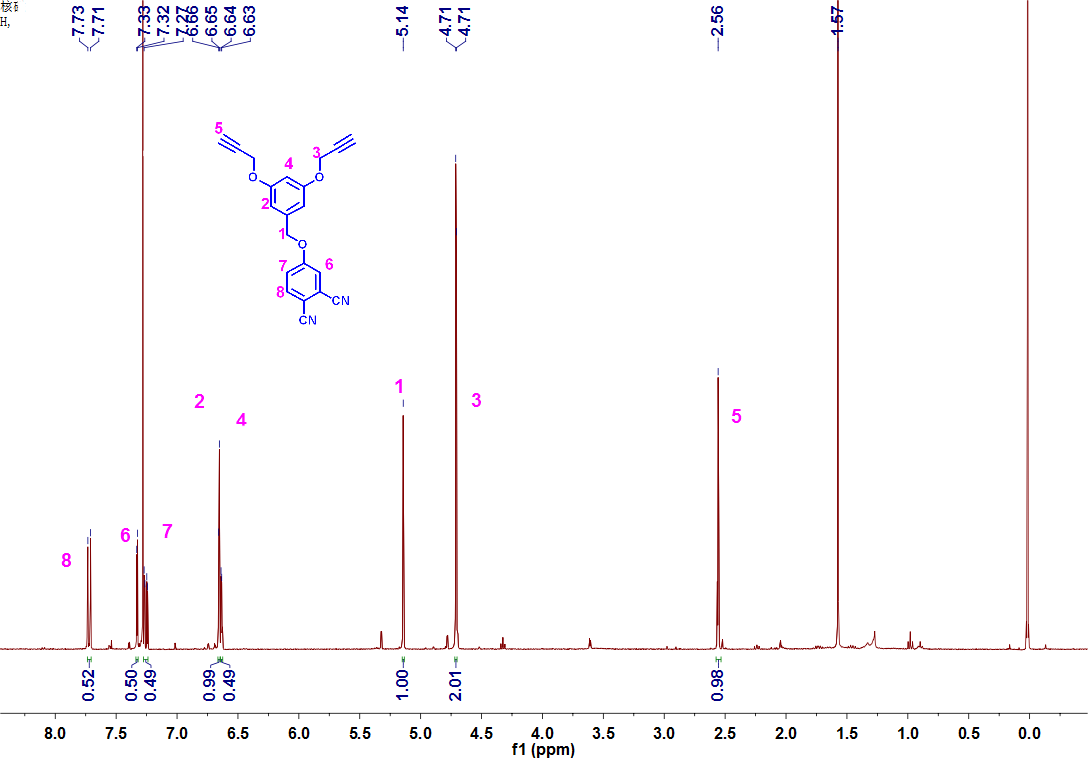


Figure S7. The 1H NMR spectrum of **Y2** (400M Hz, CDCl3).

Figure S8. The ESI-MS spectrum of **Y1**.

Figure S9. The ESI-MS spectrum of YsiPc.

Figure S10. The ESI-MS spectrum of **Y2**.

Figure S11. The ESI-MS spectrum of YZnPc.


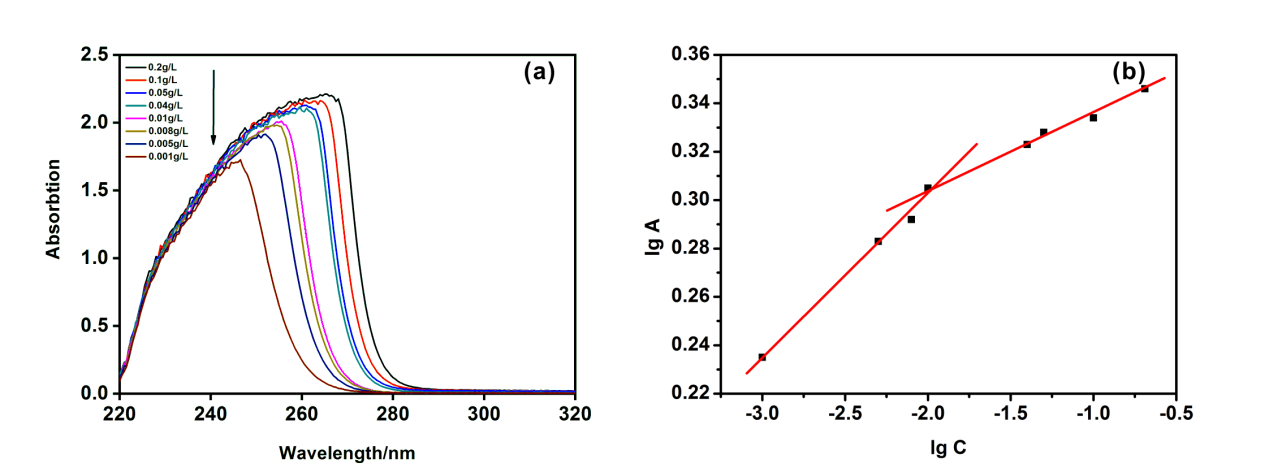


Figure S12. (a) UV-Vis spectra of PEG5000-PCL2000 copolymer in the presence of decreasing concentrations (*C*PEG5000-PCL2000 = 0.001, 0.005, 0.008, 0.01, 0.04, 0.05, 0.1, 0.2 g/L). (b) The plot of the lgA vs. lgC for PEG5000-PCL2000.


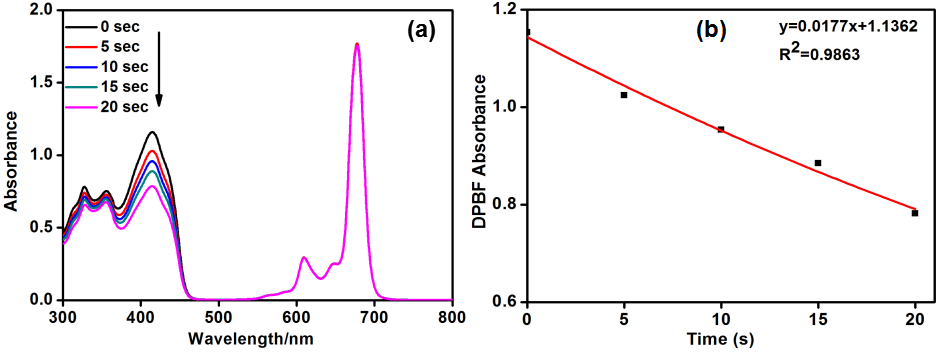


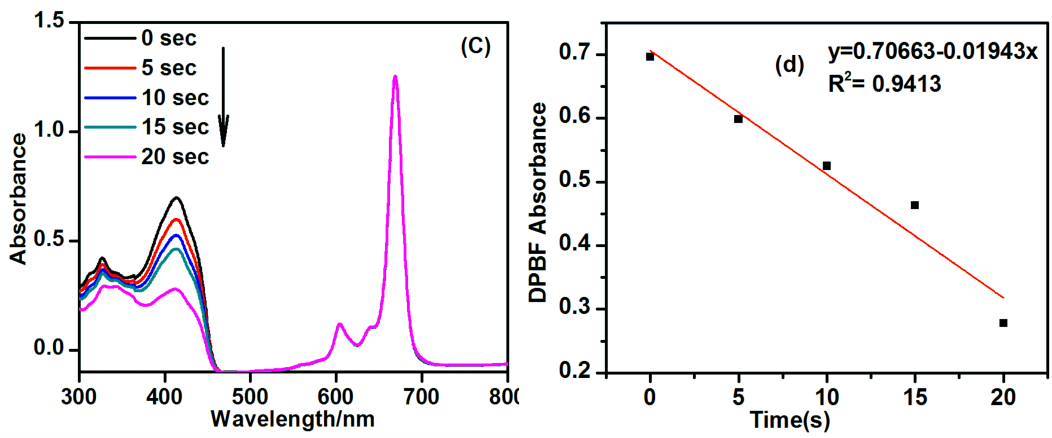


Figure S13.(a)the change of absorption spectrum of 3×105 mol/L DPBF upon irradiation time in air saturated DMF containing 6×106 mol/L YSiPc with irradiation at 633 nm. (b) The linear plot of absorbance at 417 nm against irradiation time. (c) The change of absorption spectrum of 3×105 mol/L DPBF upon irradiation time in air saturated DMF containing 6×106 mol/L YZnPc with irradiation at 633 nm. (d) The linear plot of absorbance at 417 nm against irradiation time.

Table S1. Photophysical properties of YSiPc and YZnPc.

| Complexes | Absorption  *λ*Qmax/nm | Excitation  *λ*Qmax/nm | Emission  *λ*Qmax/nm | *ε*Qmax  (L·mol-1·cm-1) | ФF | τs/ns | ФΔ |
| --- | --- | --- | --- | --- | --- | --- | --- |
| YSiPc | 675 | 611 | 685 | 2.23×105 | 0.13 | 7.99 | 0.46 |
| YZnPc | 678 | 614 | 689 | 1.73×105 | 0.08 | 3.66 | 0.50 |

Table S2. Encapsulation efficiency (EE), loading capacity (LC) and fluorescence lifetimes of polymeric nanoparticles.

| Polymeric nanoparticles | | YSiPc/YZnPc | | | τs/ns |
| --- | --- | --- | --- | --- | --- |
| EE% | Lc%(W/W) | |
| YSiPc@MPEG5000-PCL2000 | 818.1 | | 2.60.3 | 3.150.32 | |
| YZnPc@MPEG5000-PCL2000 | 650.7 | | 2.00.2 | 2.890.29 | |

EE % = (weight of phthalocyanine in micelles/weight of the added phthalocyanine) * 100%

LC % (w/w) = (weight of phthalocyanine in micelles/weight of micelles) * 100%
